# Supplementary material for: Evaluating genetic ancestry and self-reported ethnicity in the context of carrier screening
Source: PubMed Central journal article supplement (PMC5704547; doi:10.1186/s12863-017-0570-y), 2017-11-28
Supplement: 12863_2017_570_MOESM1_ESM.pdf [file 12863_2017_570_MOESM1_ESM.pdf]

Patient, please complete this column:

Clinic staff, please complete this column:

**PATIENT INFORMATION**

**CLINIC INFORMATION**

First Name \_\_\_\_\_ Last Name \_\_\_\_\_  
 Gender:  Male  Female DOB (mm/dd/yy) \_\_\_\_\_  
 Ethnicity:  African  East Asian  European  French Canadian  
 Check all that apply  Jewish  Latin American  Mediterranean  Middle Eastern  
 Native American  South Asian  Southeast Asian  Other \_\_\_\_\_  
 Address \_\_\_\_\_  
 City \_\_\_\_\_ State \_\_\_\_\_ Zip \_\_\_\_\_  
 Phone \_\_\_\_\_  
 Email \_\_\_\_\_  
Required to receive results and schedule genetic counseling

Ordering Physician \_\_\_\_\_

**Partner Information**

**SPECIMEN INFORMATION**

By providing your partner's name and date of birth, you are giving Recombine permission to link your results with your partner's results.  
 Partner's Name \_\_\_\_\_  
 Partner's DOB (mm/dd/yy) \_\_\_\_\_

Collection Date (mm/dd/yy) \_\_\_\_\_ Patient ID # \_\_\_\_\_  
 Specimen Type:  Saliva  Blood  Semen  Extracted DNA

**BILLING INFORMATION**

**TEST INFORMATION**

Option A: Bill My Insurance (Insurance Information & Credit Card Information Required)  
 Option B: Self Pay/No Insurance (Credit Card Information Required)

SELECT ANY THAT APPLY  
 Patient is a donor  
 Bill clinic for testing  
 Patient is pregnant (specify gestational age) \_\_\_\_\_  
 Patient is a known carrier (specify disease) \_\_\_\_\_  
 Sample redraw

**Insurance Information**

**CARRIERMAP GENOTYPING TEST PANEL (select one)**

In addition to completing the fields below, please attach a copy of the front and back of your insurance card or email a picture to insurance@recombine.com.

Insurance Company Name \_\_\_\_\_  
 Policyholder Name \_\_\_\_\_  
 Policy Number / Member ID \_\_\_\_\_  
 Policyholder DOB (mm/dd/yy) \_\_\_\_\_  
 Relation to Patient:  Self  Spouse  Dependent  Other

**Credit Card Information**

**ADDITIONAL TESTING (additional charges apply)**

Card # \_\_\_\_\_  
 Security Code \_\_\_\_\_ Expiration Date (mm/yy) \_\_\_\_\_

Gene Sequencing  
 To order sequencing, please check the box above, and select the diseases/genes to be sequenced on the enclosed Sequencing Order Form.

**PATIENT CONSENT**

**TEST INDICATION**

**Research Consent**

Upon completion of my genetic testing, and with my authorization, Recombine may store the remaining sample and test data to perform research studies. Recombine may keep my sample and test data for as long as Recombine deems it useful for research purposes. Recombine will remove all personal information from my test data and sample prior to using my information for such studies. My name or other personal identifying information will not be used or linked to the results of any research studies and publications. This authorization will not expire, but I may revoke my authorization at any time by contacting Recombine at 855-687-4363. Any revocation of this authorization will not affect research studies performed on my sample and test data prior to my revocation. Recombine may not condition genetic testing on my decision to authorize or not authorize the use of my remaining sample and test information for research.

**ICD-10 Codes – CHECK ALL THAT APPLY**

I authorize Recombine to store my patient sample and test data to perform research studies as described above and on the attached informed consent form.  
 I do not authorize Recombine to store and use my patient sample and test data for research studies.

- Z15.89 High Risk Ethnicity
- Z31.430 Screening for genetic disease carrier status - Female
- Z31.440 Screening for genetic disease carrier status - Male
- Z34.01 Supervision, normal first pregnancy 1st Trimester
- Z34.02 Supervision, normal first pregnancy 2nd Trimester
- Z34.03 Supervision, normal first pregnancy 3rd Trimester
- Z34.81 Supervision, other normal pregnancy 1st Trimester
- Z34.82 Supervision, other normal pregnancy 2nd Trimester
- Z34.83 Supervision, other normal pregnancy 3rd Trimester
- Z84.3 Consanguinity
- Z84.81 Family History of Genetic Disease Carrier (specify disease & family member) \_\_\_\_\_
- OTHERS: \_\_\_\_\_

**Test Authorization**

**ORDERING HEALTH CARE PROFESSIONAL AUTHORIZATION**

By signing below, I certify that I have read the attached informed consent form for genetic testing, have discussed the benefits, risks, and limitations of genetic testing with my physician, and consent for Recombine to perform the genetic test(s) ordered by my physician. I further certify that I have received and have reviewed a copy of "Patient Billing Basics", and have been given the opportunity to ask my physician and Recombine questions concerning the payment terms outlined within this document. I agree that all of my questions have been answered to my satisfaction and I accept the payment terms.

I hereby order Recombine to conduct the above tests, which I have determined to be medically necessary. I have explained genetic testing (including the risks, benefits, and alternatives) to this individual. I have addressed the limitations outlined in the informed consent form, and I have answered this person's questions to the best of my ability.

Patient Signature \_\_\_\_\_ Date \_\_\_\_\_

Provider Signature \_\_\_\_\_ Date \_\_\_\_\_

**Instructions for Sample Collection**

- Complete enclosed requisition and consent forms in their entirety. (If testing the patient's partner, be sure to complete the "Partner Information" section).
- Fill out patient's name and DOB on the patient identifier stickers below. Place one patient identifier sticker on the sample collection tube.
- Upon collecting the patient's sample, place the collection tube in the biohazard bag.
- Place the kit in the provided FedEx Clinical Pak. Ship by dropping the kit at a FedEx drop box or scheduling a pick-up through FedEx.com or 1-800-goFedEx.

|                                                   |                                                   |                                                   |                                                   |
|---------------------------------------------------|---------------------------------------------------|---------------------------------------------------|---------------------------------------------------|
| For sample collection tube                        | Extra sticker, if needed                          | Extra sticker, if needed                          | Extra sticker, if needed                          |
| Patient First & Last Name: _____                  | Patient First & Last Name: _____                  | Patient First & Last Name: _____                  | Patient First & Last Name: _____                  |
| Date of Birth: _____<br><small>(mm/dd/yy)</small> | Date of Birth: _____<br><small>(mm/dd/yy)</small> | Date of Birth: _____<br><small>(mm/dd/yy)</small> | Date of Birth: _____<br><small>(mm/dd/yy)</small> |
